# Supplementary material
Source: publisher figshare collection journal article supplement (https://gsajournals.figshare.com/ndownloader/files/13507292)
Supplement: Supplementary file 1 [file 13507292]

**Conidial morphogenesis and septin-mediated plant infection require Smo1, a Ras GTPase-activating protein in *Magnaporthe oryzae***

**Michael J. Kershaw*, Magdalena Basiewicz*, 2, Darren M. Soanes*, Xia Yan*, 1, Lauren S. Ryder*, 1**, **Michael Csukai†, Miriam Oses-Ruiz, Barbara Valent‡ and Nicholas J. Talbot*1, 3**

*School of Biosciences, University of Exeter, Exeter EX4 4QD, UK.

†Biological Sciences, Syngenta, Jeallott’s Hill International Research Centre, Bracknell, RG42 6EY, UK.

‡Department of Plant Pathology, Kansas State University, Manhattan, Kansas 66506, USA

**Supplemental Table and Figure Legends**

**Table S1** Smo1 mutants used in this study and characteristics of the genome sequences generated

**Table S2** Primers used in this study

**Figure S1.** Multiple sequence alignment using Clustal X (Larkin et al. 2007) showing GTPase activating proteins from *M. oryzae* in Maximum likelihood phylogenetic tree created using PhyML. Bootstrap support values of 70 or greater are indicated on tree.

**Figure S2.** Complementation of the *smo1* mutant restores wild type phenotypes. (A) Micrographs showing spore morphology of Guy11 and *smo1* mutant complemented with the Smo1-GFP fusion construct, and the *smo1-* strain CP750 complemented with wild type *SMO1* allele. Bar = 10 m (B) Photographs of leaves from infected seedlings of rice cultivar CO-39 inoculated with conidial suspensions (1 x 105 ml-1) of wild type Guy11, *smo1* and *smo1* mutant complemented with *SMO1-GFP*.

**Figure S3.** Cellular localisation of H1-RFP by live cell imaging in (A) a wild type Guy11 background and (B) the *smo1* mutant background, visualized by epifluorescence microscopy over a time course of infection related development. Bar = 10 m. (C) Calcofluor-white staining of conidia, germ tubes and appressoria of the wild type strain Guy11 and *smo1* mutant at 24 hpi. Bar = 10 m.
